# Supplementary material for: Ultrasound lighting up AIEgens for potential surgical navigation
Source: Royal Society of Chemistry journal article supplement (doi:10.1039/d0tb02832k), 2021-01-01
Supplement: d0tb02832k1.pdf [file d0tb02832k1.pdf]

## Electronic Supplementary Information

### Ultrasound-Light up AIEgens for Potential Surgical Navigation

Lixiu Chen<sup>a#</sup>, Bin Xia<sup>a#</sup>, Bing Yan<sup>b#</sup>, Jianhua Liu<sup>a</sup>, Zhaohua Miao<sup>a</sup>, Yan Ma<sup>a</sup>, Jinchen Wang<sup>a</sup>, Hu Peng<sup>b</sup>,  
Tao He<sup>a\*</sup>, and Zhengbao Zha<sup>a\*</sup>

<sup>a</sup> School of Food and Biological Engineering, School of Chemistry and Chemical Engineering, Hefei University of Technology, Hefei 230009, P.R. China.

<sup>b</sup> School of Instrument Science and Optoelectronics Engineering, Hefei University of Technology, Hefei 230009, P.R. China.

\* Corresponding author. Email: [zbzha@hfut.edu.cn](mailto:zbzha@hfut.edu.cn); [taohe@hfut.edu.cn](mailto:taohe@hfut.edu.cn);

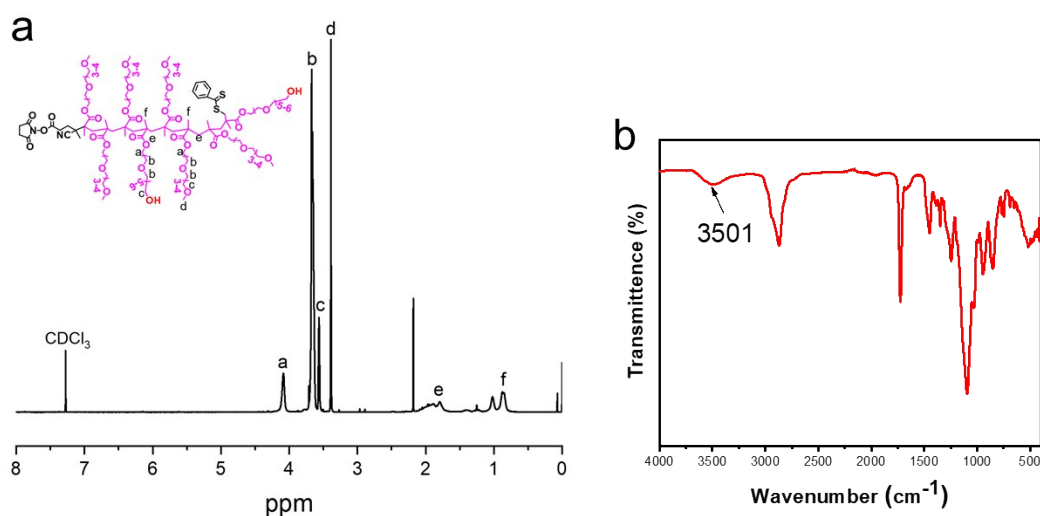

**Fig. S1** <sup>1</sup>H-NMR spectrum (a) and FTIR spectrum (b) of P((OEGMA-CH<sub>3</sub>)<sub>6</sub>-co-(OEGMA-OH)<sub>2</sub>).

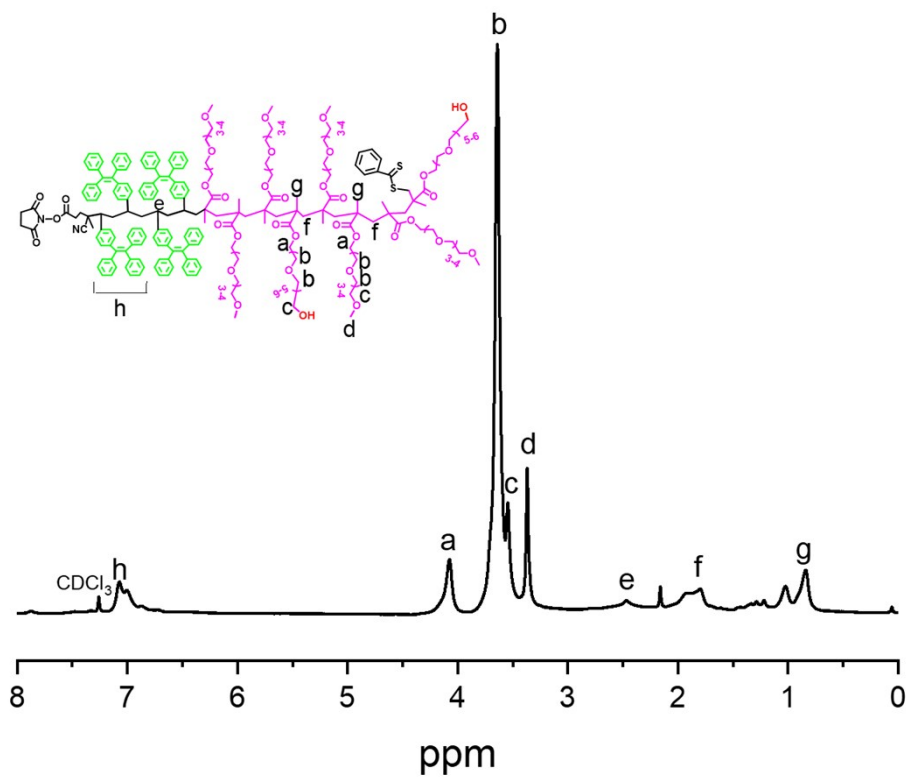

**Fig. S2**  $^1\text{H-NMR}$  spectrum of  $\text{P}((\text{OEGMA-CH}_3)_6\text{-co-(OEGMA-OH)}_2)\text{-b-TPE}_4$ .

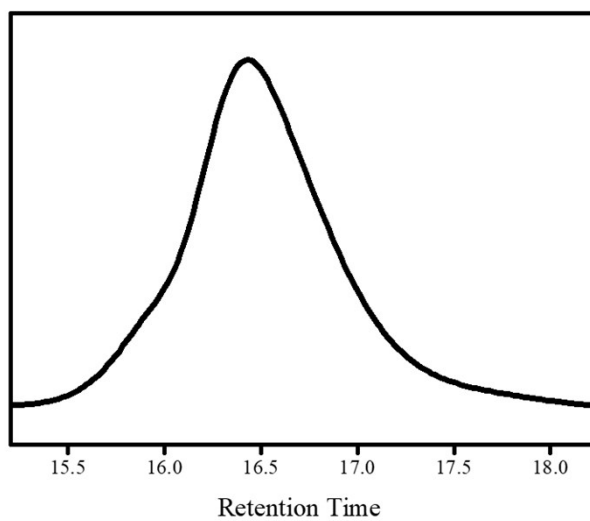

**Fig. S3** GPC curve of  $\text{P}((\text{OEGMA-CH}_3)_6\text{-co-(OEGMA-OH)}_2)\text{-b-TPE}_4$  ( $M_w$ : 4.4k, PDI: 1.28).

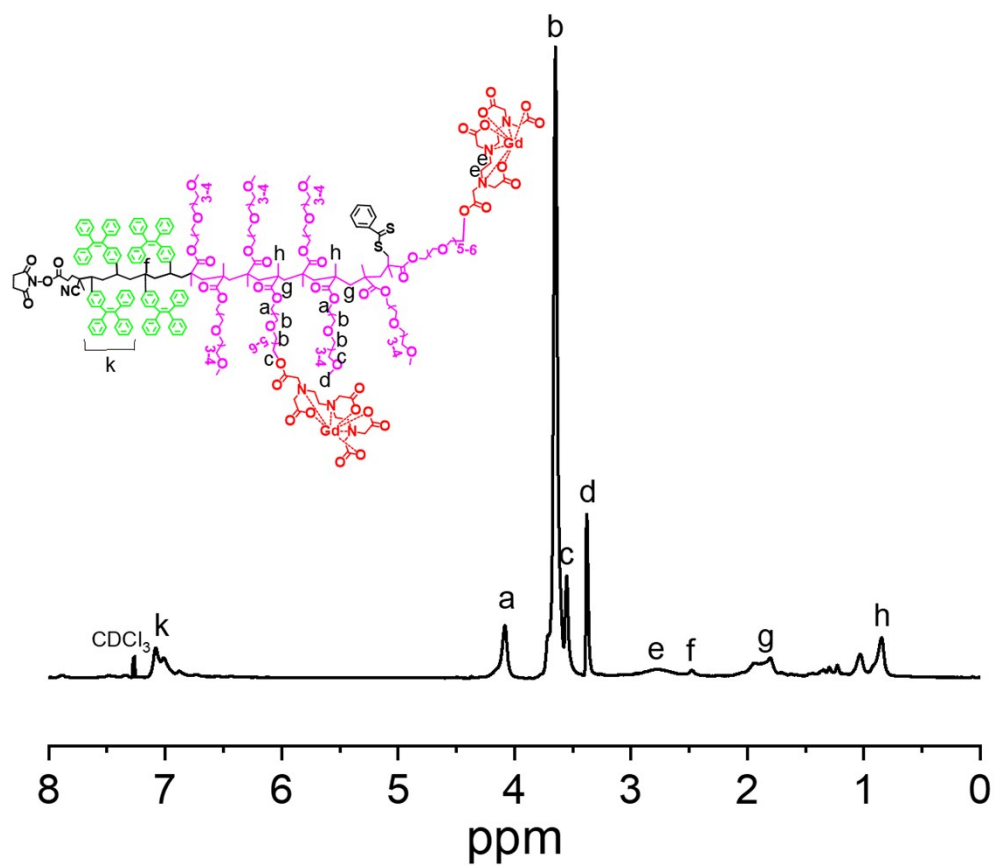

**Fig. S4**  $^1\text{H-NMR}$  spectrum of  $\text{P}((\text{OEGMA-CH}_3)_6\text{-co-(OEGMA-Gd)}_2)\text{-b-TPE}_4$  (AIE-Gd).

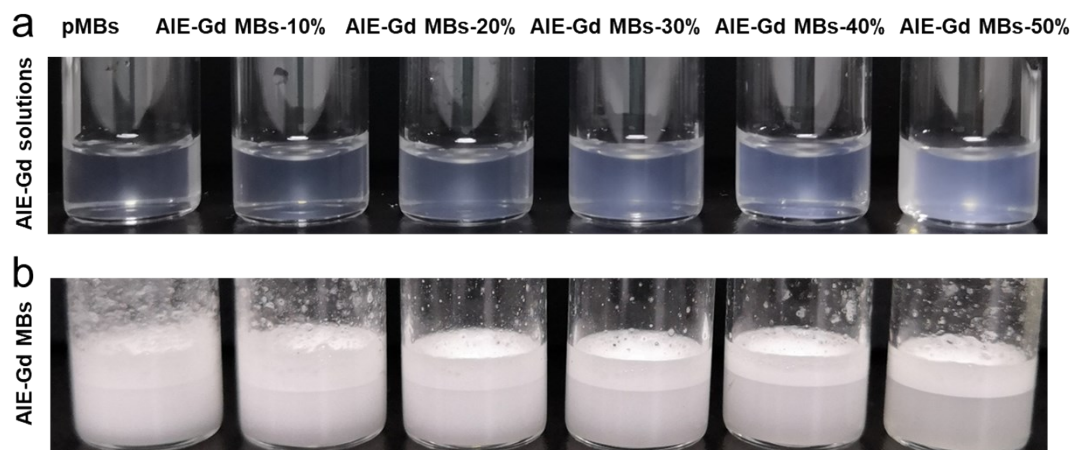

**Fig. S5** Photos of the aqueous dispersions of AIE-Gd solution (a) and AIE-Gd MBs (b) with different compositions: pMBs, AIE-Gd MBs-10%, AIE-Gd MBs-20%, AIE-Gd MBs-30%, AIE-Gd MBs-40% and AIE-Gd MBs-50%.

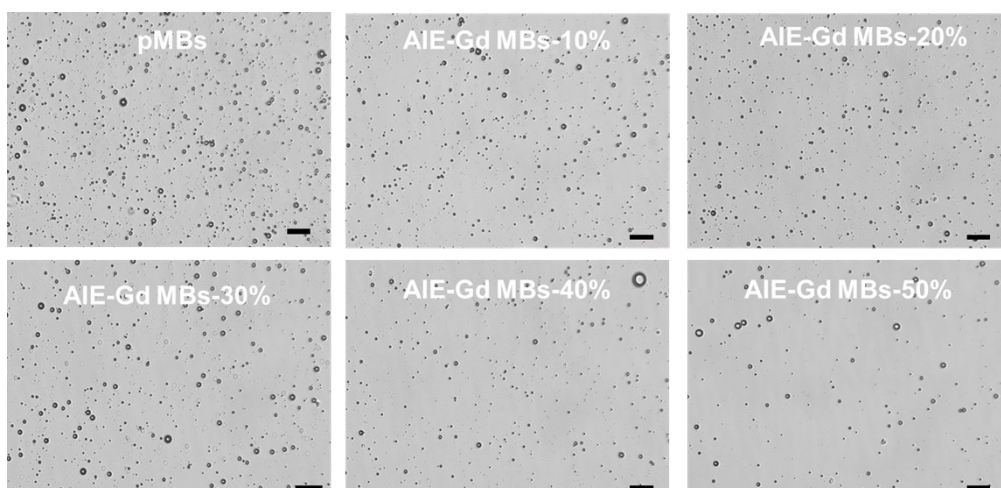

**Fig. S6** Microscopic images of pMBs, AIE-Gd MBs-10%, AIE-Gd MBs-20%, AIE-Gd MBs-30%, AIE-Gd MBs-40% and AIE-Gd MBs-50% (scale bar = 20  $\mu\text{m}$ ).

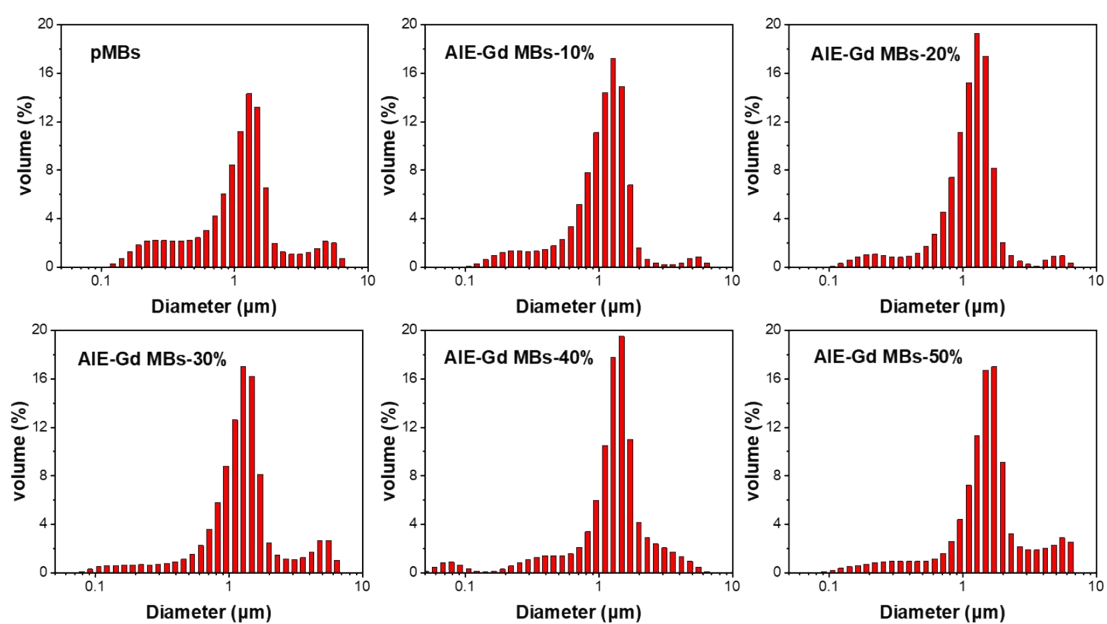

**Fig. S7** Size distribution of pMBs, AIE-Gd MBs-10%, AIE-Gd MBs-20%, AIE-Gd MBs-30%, AIE-Gd MBs-40% and AIE-Gd MBs-50%.

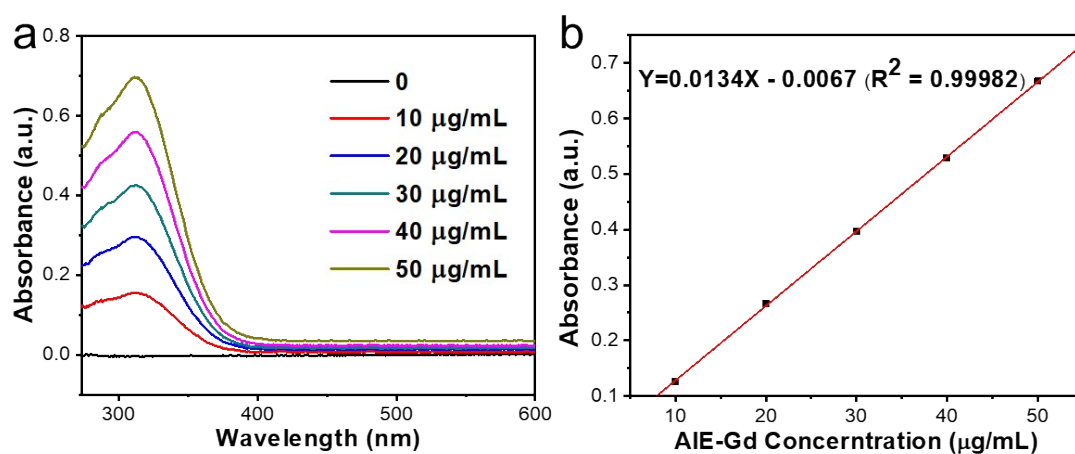

**Fig. S8** Absorption spectra of AIE-Gd in DMSO with different concentrations (a) and corresponding UV-vis standard curve (b) (AIE-Gd absorbance peak at 310 nm).

**Table S1.** Composition, concentration, mean diameter and loading content of AIE-Gd MBs

| Formulation    | AIE-Gd:DSPC:DSPE-PEG <sub>2000</sub> | MB concentration          | Mean diameter | Loading content |
|----------------|--------------------------------------|---------------------------|---------------|-----------------|
|                | (mol:mol:mol)                        | (x10 <sup>8</sup> MBs/mL) | (µm)          | (%)             |
| pMBs           | 0/9/1                                | 2.38 ± 0.34               | 1.32 ± 0.03   | 0               |
| AIE-Gd MBs-10% | 1/8/1                                | 2.29 ± 0.33               | 1.30 ± 0.06   | 11.4 ± 0.7      |
| AIE-Gd MBs-20% | 2/7/1                                | 1.57 ± 0.22               | 1.32 ± 0.06   | 21.7 ± 0.3      |
| AIE-Gd MBs-30% | 3/6/1                                | 1.15 ± 0.19               | 1.34 ± 0.07   | 35.8 ± 0.9      |
| AIE-Gd MBs-40% | 4/5/1                                | 1.01 ± 0.10               | 1.42 ± 0.007  | 45.1 ± 2.5      |
| AIE-Gd MBs-50% | 5/4/1                                | 0.64 ± 0.24               | 1.60 ± 0.12   | 55.6 ± 2.9      |

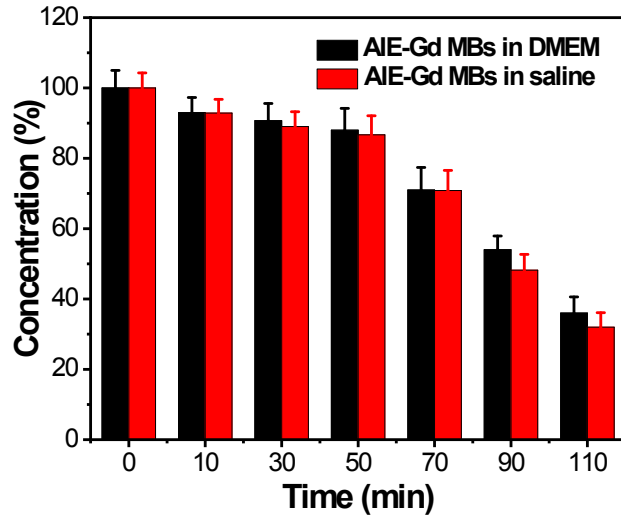

**Fig. S9** AIE-Gd MBs concentration change after incubation in DMEM or saline for different time.

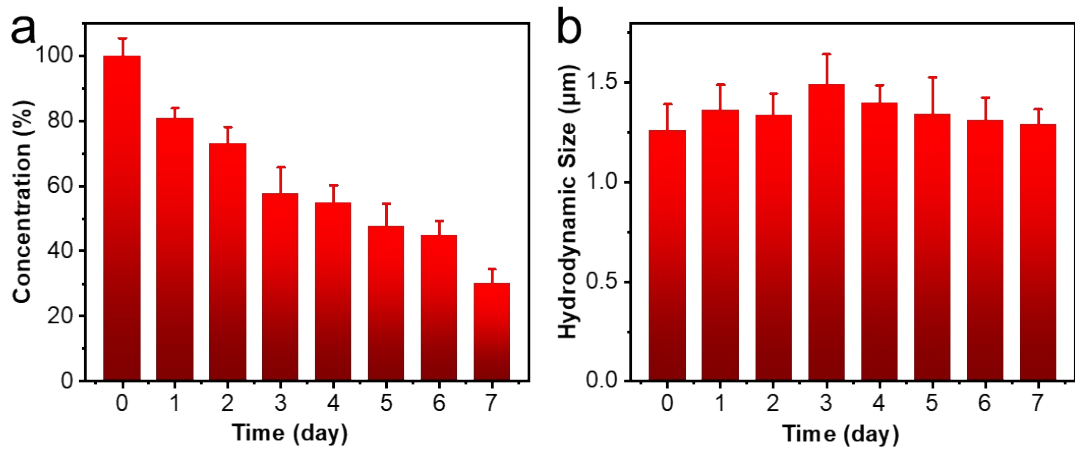

**Fig. S10** Stability of the concentration (a) and hydrodynamic size (b) of AIE-Gd MBs stored at room temperature.

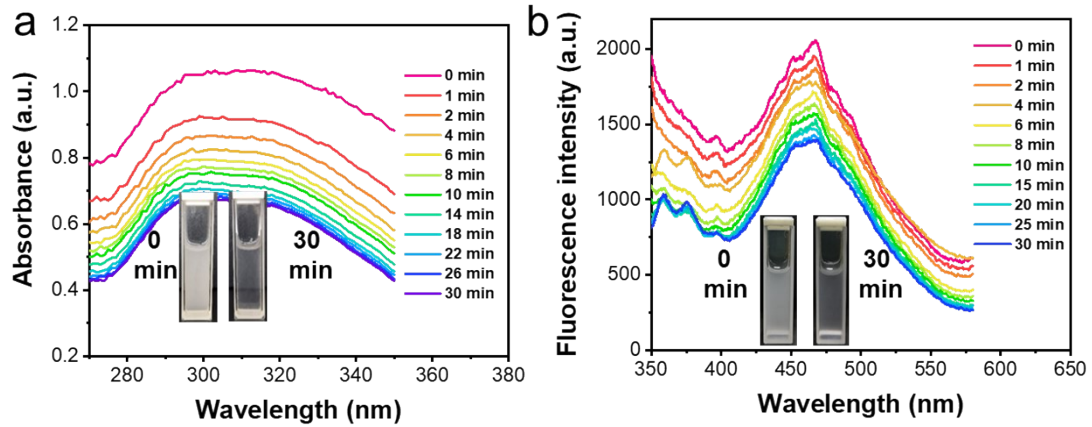

**Fig. S11** Dynamic absorption spectra (a) and fluorescence spectra (b) of AIE-Gd MBs suspension (inset: photographs of AIE-Gd MBs dispersed in PBS were kept static in 0 min and 30 min).

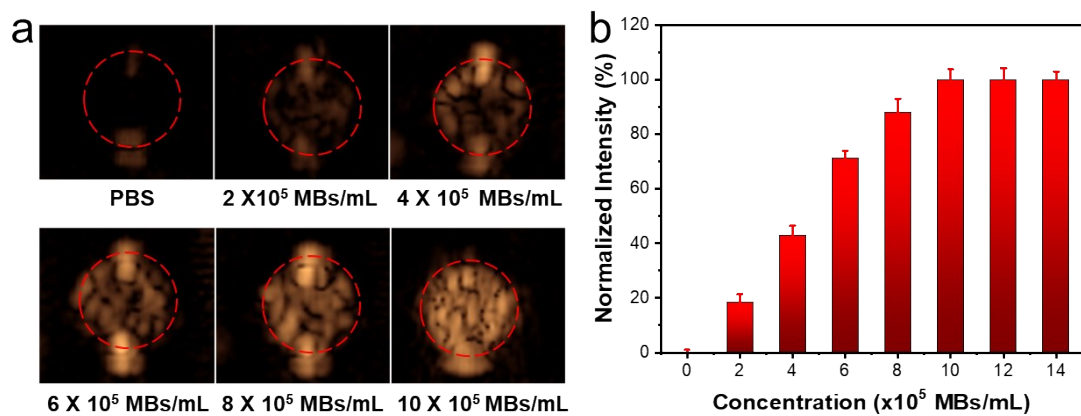

**Fig. S12** *In vitro* US imaging. (a) US imaging of AIE-Gd MBs with increasing concentration in a latex tube and (b) US signal intensities versus concentration of the MBs.



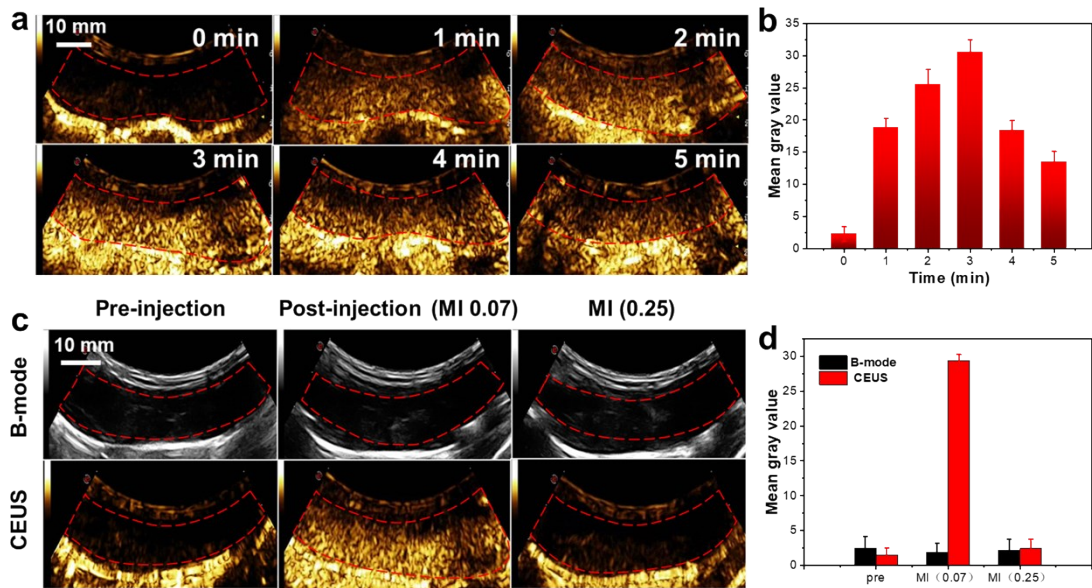

**Fig. S13** *In vivo* US imaging. US imaging (a) and US signal intensities (b) of the rabbit liver in 5 min with MI = 0.07. US imaging (c) and US signal intensities (d) after intravenous injection AIE-Gd MBs and treated with US MI=0.07, UTMD was carried out by suddenly increasing the MI to 0.25.

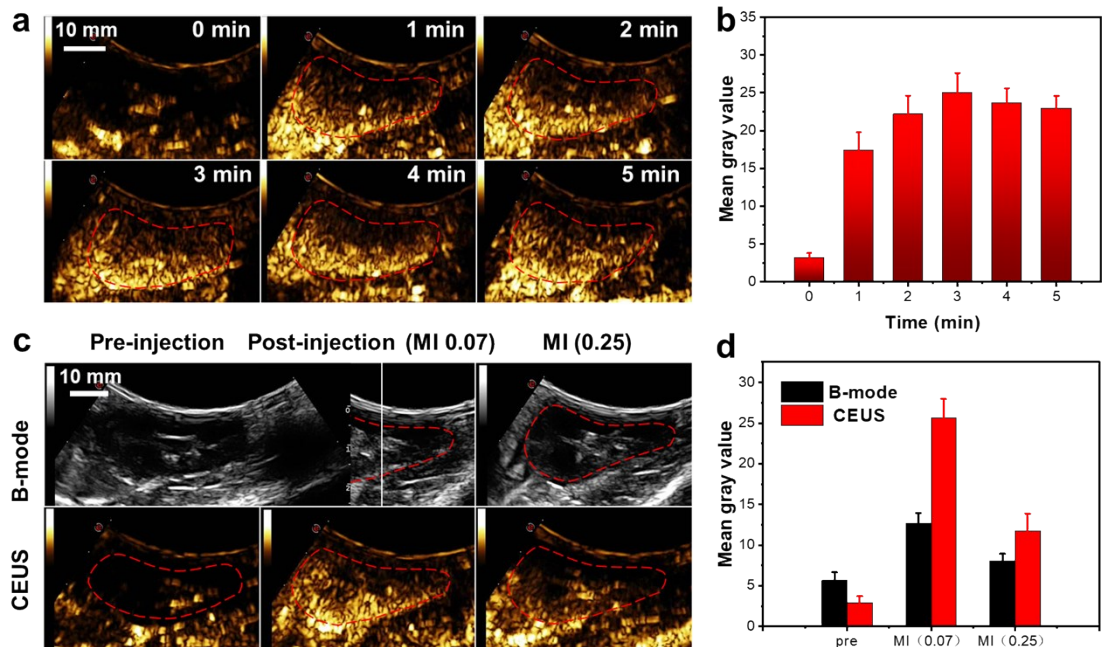

**Fig. S14** *In vivo* US imaging. US imaging (a) and US signal intensities (b) of the rabbit kidney in 5 min with MI = 0.07. US imaging (c) and US signal intensities (d) after intravenous injection AIE-Gd MBs and treated with US MI=0.07, UTMD was carried out by suddenly increasing the MI to 0.25.
